# Supplementary material for: Enhanced polarization via Joule heating in wood-derived carbon materials for absorption-dominated EMI shielding
Source: Royal Society of Chemistry journal article supplement (doi:10.1039/d3mh01332d), 2023-11-08
Supplement: d3mh01332d1.pdf [file d3mh01332d1.pdf]

## Supplementary Information

### **Polarization-Enhanced Absorption to EMI Shielding via Joule Heating in Wood-Derived Carbon Foams**

Haoyang Feng<sup>a</sup>, Jianming Hong<sup>a</sup>, Jiayang Zhang<sup>a</sup>, Pingping He<sup>b,c</sup>, Honghai Zhou<sup>a</sup>,

Sai Wang<sup>a\*</sup>, Hongna Xing<sup>d</sup>, Ruosong Li<sup>b,c\*</sup>

- a. School of Mechatronic Engineering, Shenzhen Polytechnic, Shenzhen, Guangdong 518055, China
- b. School of Chemical Engineering, Northwest University, Xi'an, Shaanxi, 710069, China
- c. Xi'an Key Lab of Green Hydrogen Energy Production, Storage & Application Integration Technology, 710069, China
- d. School of Physics, Northwest University, Xi'an, Shaanxi, 710069, China  
E-mail: wangsai@szpt.edu.cn; ruosongli@nwu.edu.cn

#### **Note S1. Preparation of carbonized wood**

Put the natural balsa wood with a size of 4 cm × 4 cm × 1 cm into a mixed aqueous solution (2.5 mol/L NaOH and 0.4 mol L<sup>-1</sup> Na<sub>2</sub>SO<sub>3</sub>) at 60 °C for 7 h, and then immerse the wood pieces in deionized water several times to remove excess chemicals. Put the wood block into hydrogen peroxide solution (2.5 mol L<sup>-1</sup> H<sub>2</sub>O<sub>2</sub>) until the wood block is entirely white, and then immerse the obtained wood block in deionized water several times to remove impurities and chemicals. Put the white wood blocks into a freeze dryer and dry for 16 h to obtain delignified wood blocks.

The delignified wood blocks are pre-carbonized at 260 °C for 6 hours in a drying oven; then carbonized in a tube furnace, the temperature is first raised to 300 °C under an Ar atmosphere throughout the process and then heated to 1000 °C for 6 h for carbonization at a heating rate of 5 °C min<sup>-1</sup>, and finally a carbonized delignified wood block is obtained.

### **Note S2. CVD method**

(1) Open the high-temperature zone and raise to 200 °C. Inject Ar gas (200 ml/min) and open the low-temperature zone.

(2) At 500 °C, fully open the Ar gas to make safety preparations for the later introduction of dangerous gases.

(3) Raise the temperature in the high-temperature zone to 600 °C and introduce H<sub>2</sub> gas (65 ml/min) to reduce the sample.

(4) At 450°C, the iron phthalocyanine powder situated in the lower-temperature region starts to sublime and migrates to the higher-temperature zone, resulting in the release of blue-purple smoke. This is the appropriate moment to introduce CH<sub>4</sub> gas (35 ml/min) as a carbon source for the growth of CNTs.

(5) Allow continuous growth for about 20 min. When the blue-purple smoke in the low-temperature region has substantially disappeared, it indicates that the growth of CNTs has ended. Turn off the CH<sub>4</sub> gas and keep the Ar unblocked until the temperature drops to room temperature. The products were Co@CNTs/CW foams.

### **Note S3. Characterization**

Raman spectroscopy (LabRAM HR800) with a 532 nm HeNe laser line and X-ray diffraction with a D8 advance X-ray diffractometer were performed to investigate the structural phase. Additionally, the valence state of surface chemical compositions was analyzed through X-ray photoelectron spectroscopy (ESCALAB 250, Thermo). To examine magnetic properties at room temperature, vibrating sample magnetometry (LakeShore-7400) was employed. Thermal stability and decomposition processes were evaluated using thermogravimetry analysis. The morphology was observed using scanning electron microscopy (JSM-7001) and transmission electron microscopy (JEM 2100), while the density was calculated based on the measured mass and volume.

To determine the electrical conductivity, a four-point probe system (ST2258C, Suzhou Jingge Electronics Co., Ltd, China) was used. The water contact angle was measured through a CAST 2.0 contact angle analysis instrument (Solon Information Technology). The temperature

distribution was observed through an infrared camera, specifically the VarioCAM high resolution (InfraTec GmbH, Germany). The total EMI SE (EMI  $SE_T$ ) was calculated as the combination of absorption SE ( $SE_A$ ), reflection SE ( $SE_R$ ), and multi-reflection SE ( $SE_M$ ).  $SE_M$  can be included in  $SE_A$  since the EMWs were continuously reflected within the shield until absorbed. Therefore, EMI  $SE_T$  was expressed as:

$$SE_T = SE_R + SE_A \quad (S1)$$

Furthermore, to acquire the EMI SE values, Eqs (2) to (6) were applied to the scattering parameters, specifically  $S_{11}$  and  $S_{21}$ :

$$R = |S_{11}|^2 = |S_{22}|^2 \quad (S2)$$

$$T = |S_{21}|^2 = |S_{12}|^2 \quad (S3)$$

$$A = 1 - |S_{11}|^2 - |S_{12}|^2 \quad (S4)$$

$$SE_R = -10 \log(1 - R) \quad (S5)$$

$$SE_A = -10 \log\left(\frac{T}{1 - R}\right) \quad (S6)$$

**Note S4. Expression of permeability ( $\mu_i$ )**

$$\mu_i = \frac{M_s^2}{akH_c M_s + b\lambda\xi} \quad (S7)$$

where  $a$  and  $b$  are constants determined by the material,  $k$  is a proportionality coefficient,  $\lambda$  and  $\xi$  are magnetostriction constant and elastic strain parameters, respectively.

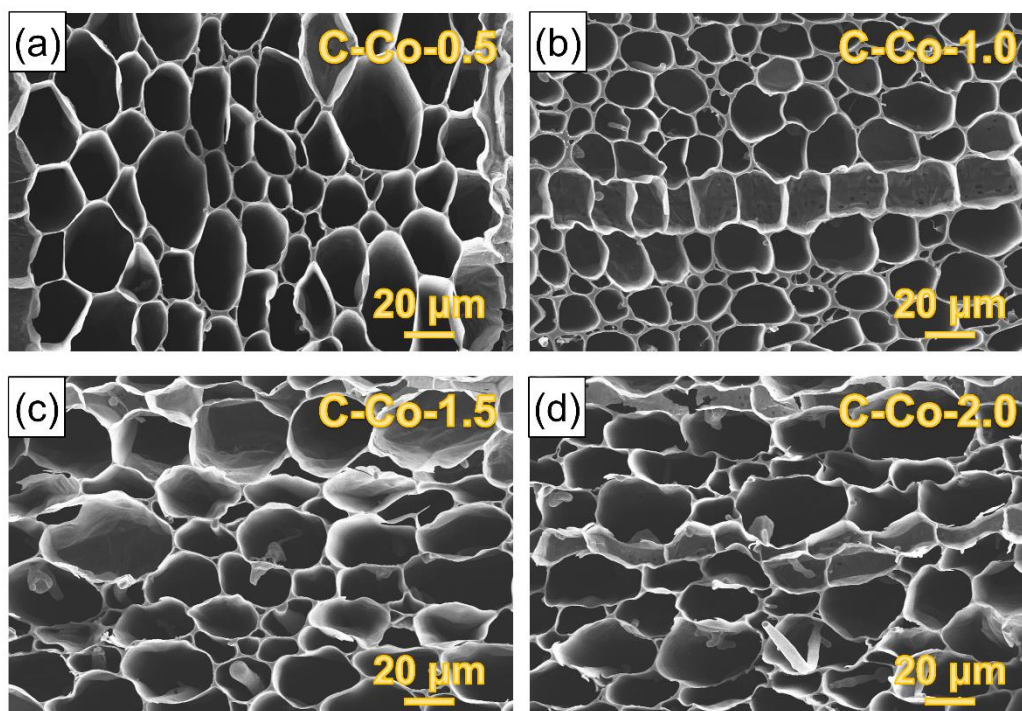

Fig. S1. Cell morphology of (a) C-Co-0.5, (b) C-Co-1.0, (c) C-Co-1.5, and (d) C-Co-2.0.

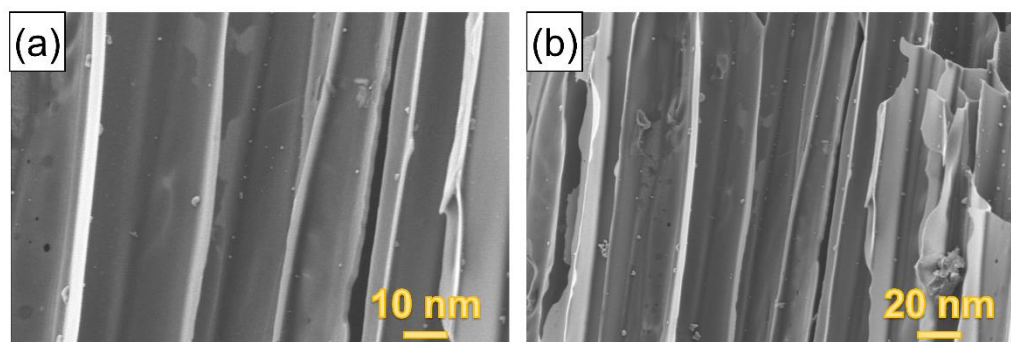

Fig. S2. Structure in the axial (growth direction) directions in Co@CNTs/CW foams.

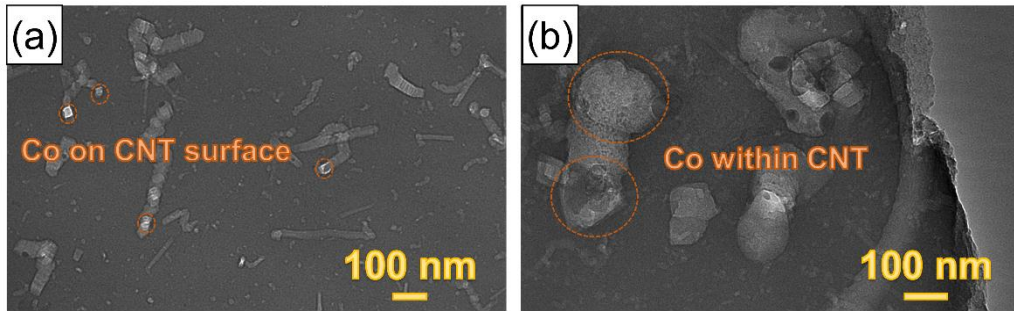

Fig. S3. TEM image of (a) Co nanoparticles on the surface of CNTs and (b) Co nanoparticles encapsulated within CNTs.

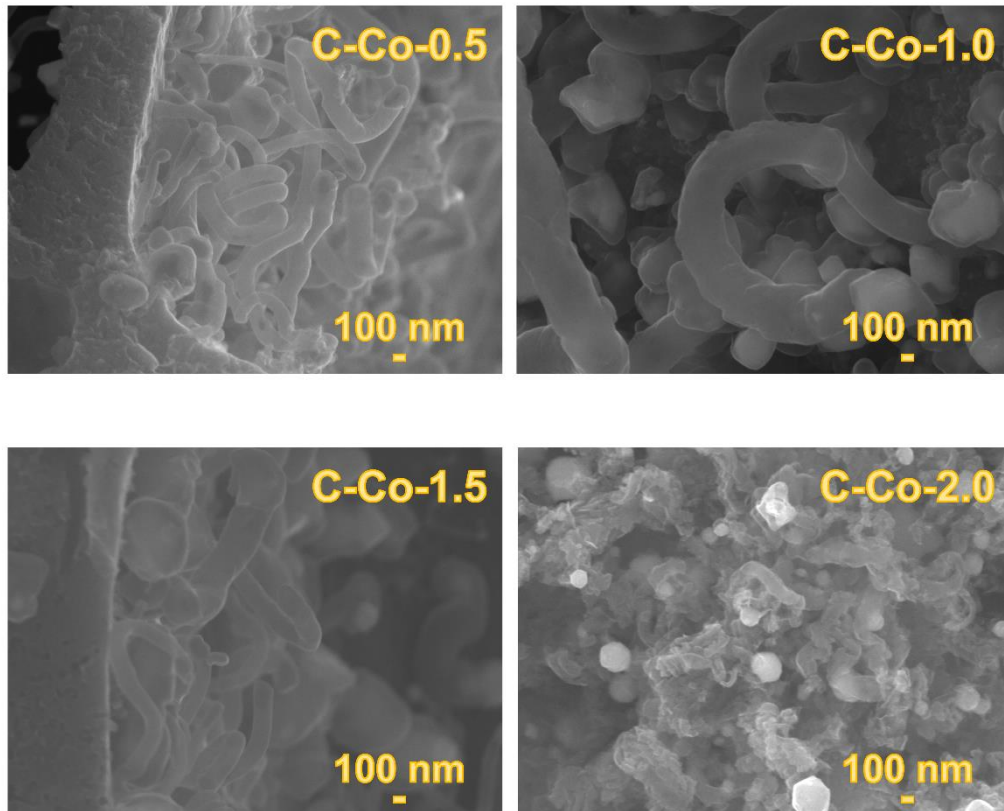

Fig. S4. The size of Co nanoparticles in Co@CNTs/CW foams.

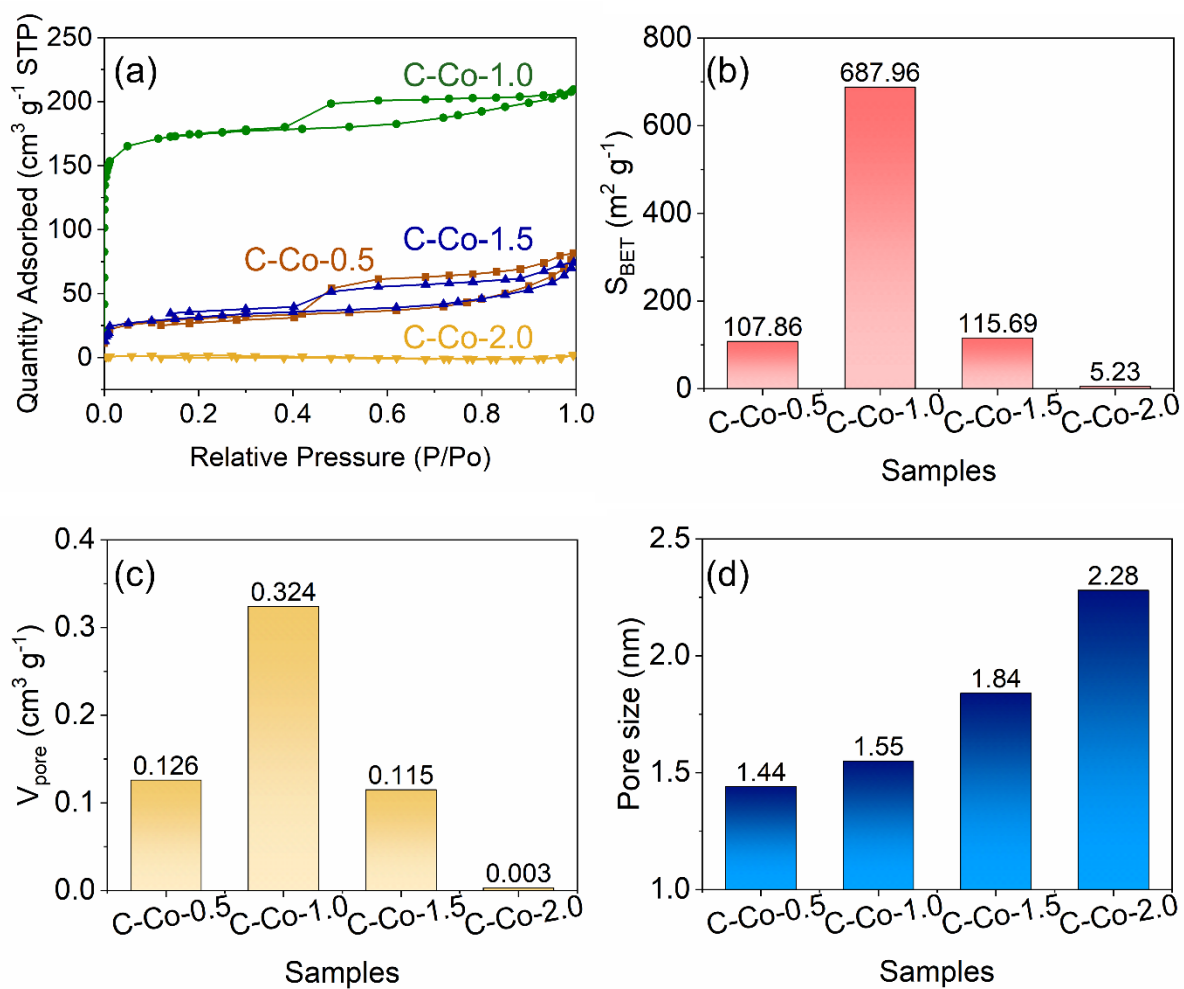

Fig. S5. (a)  $N_2$  adsorption-desorption curve, (b)  $S_{BET}$ , (c)  $V_{pore}$ , and (d) pore size.

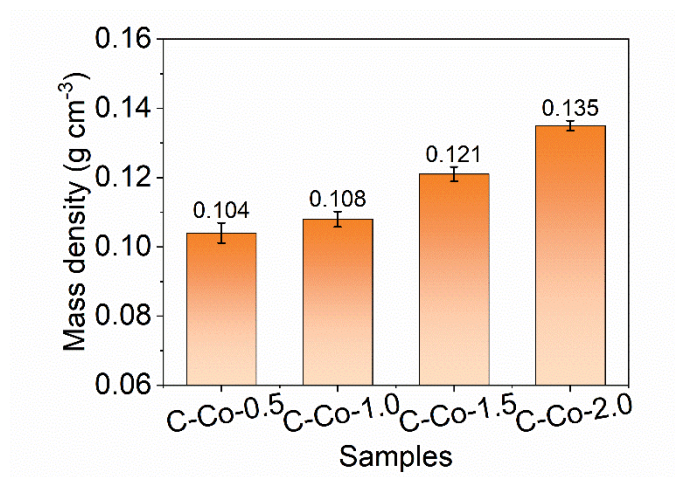

Fig. S6. Mass density of Co@CNTs/CW foams.



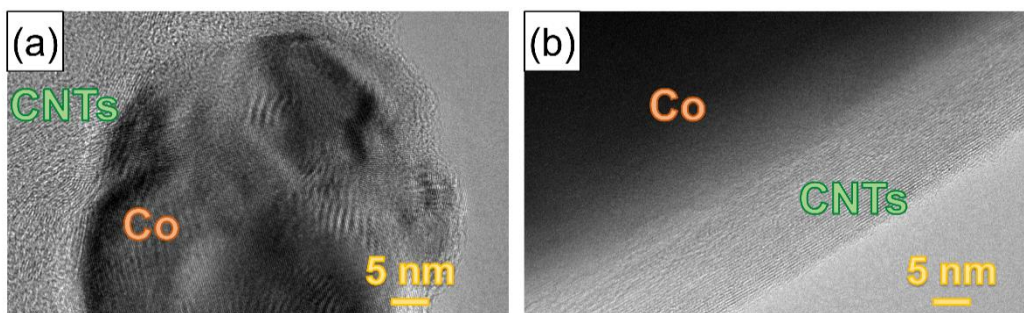

Fig. S7. TEM image of Co sections.

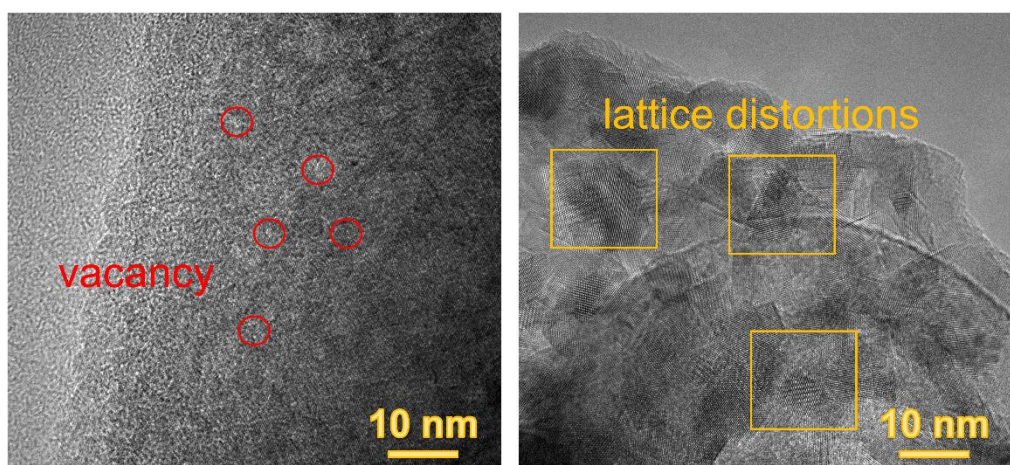

Fig. S8. HRTEM of Co@CNTs.

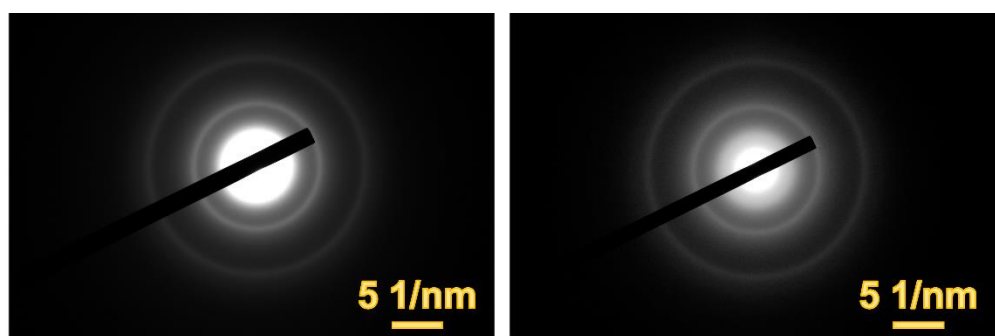

Fig. S9. SAED patterns of CNTs at different regions in Co@CNTs/CW foams.

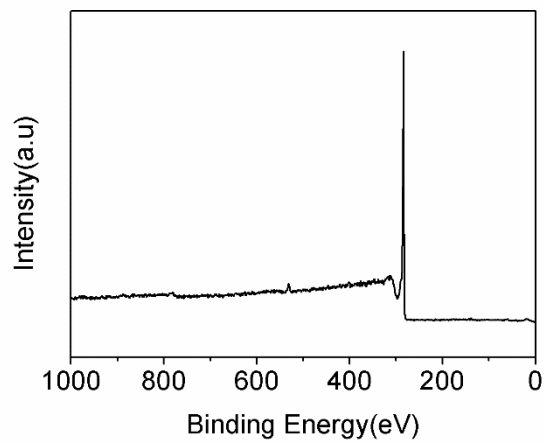

Fig. S10. Full XPS survey.

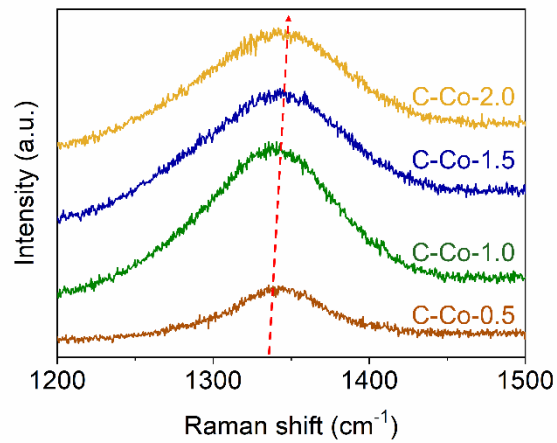

Fig. S11. Center of the D peak of Co@CNTs/CW foams in the Raman shift.

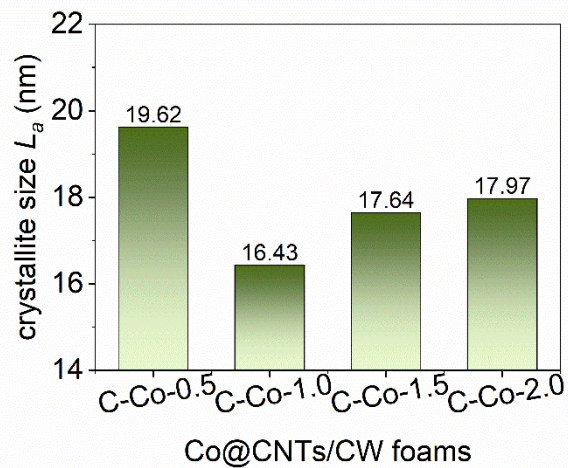

Fig. S12. Graphite crystallite size of Co@CNTs/CW foams.



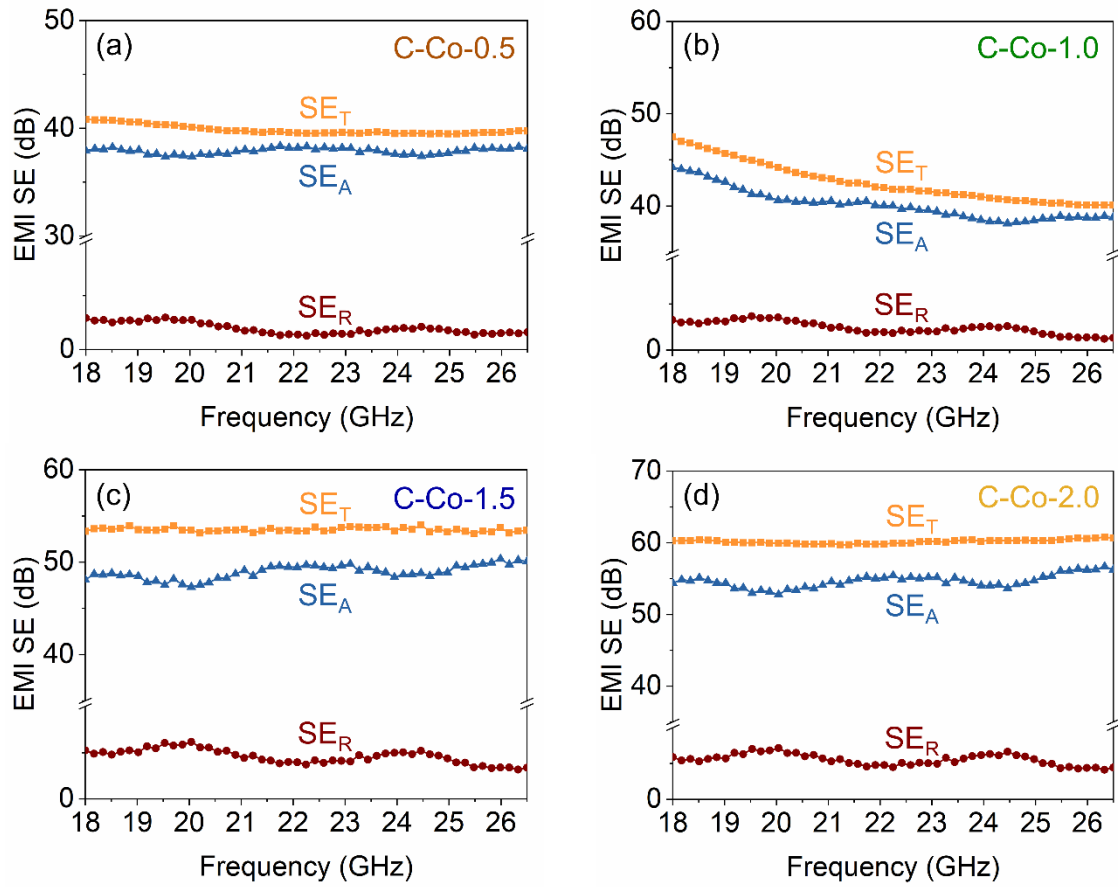

Fig. S13. EMI  $SE_T$ ,  $SE_A$ , and  $SE_R$  curves of (a) C-Co-1.0, (b) C-Co-1.0, (c) and C-Co-1.5, and (d) C-Co-2.0.

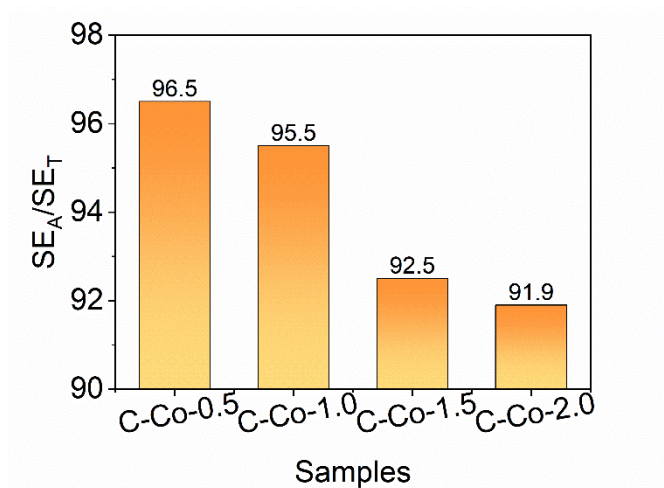

Fig. S14. Ratio of  $SE_A$  to  $SE_T$  of Co@CNTs/CW foams.

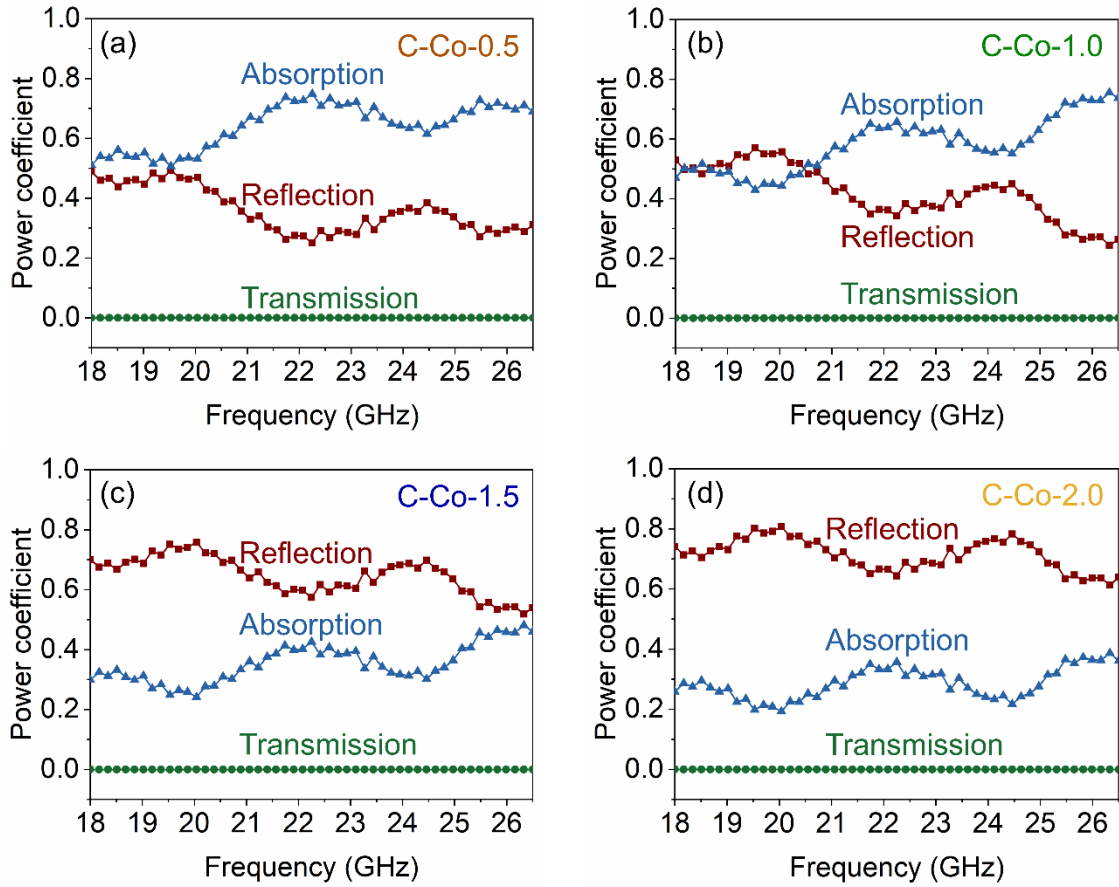

Fig. S15. A, R, and T power coefficient of (a) C-Co-1.0, (b) C-Co-1.0, (c) and C-Co-1.5, and (d) C-Co-2.0.

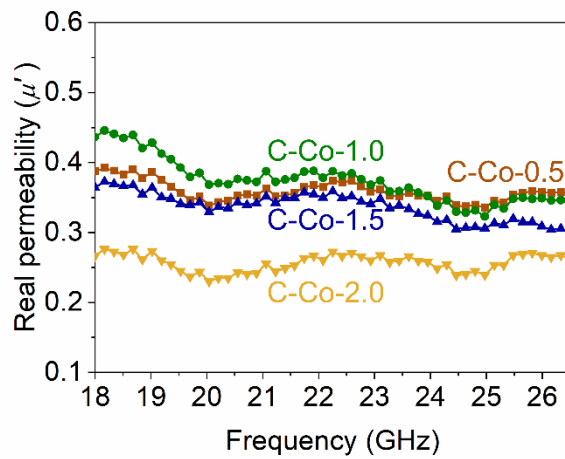

Fig. S16. Real permeability of Co@CNTs/CW foams

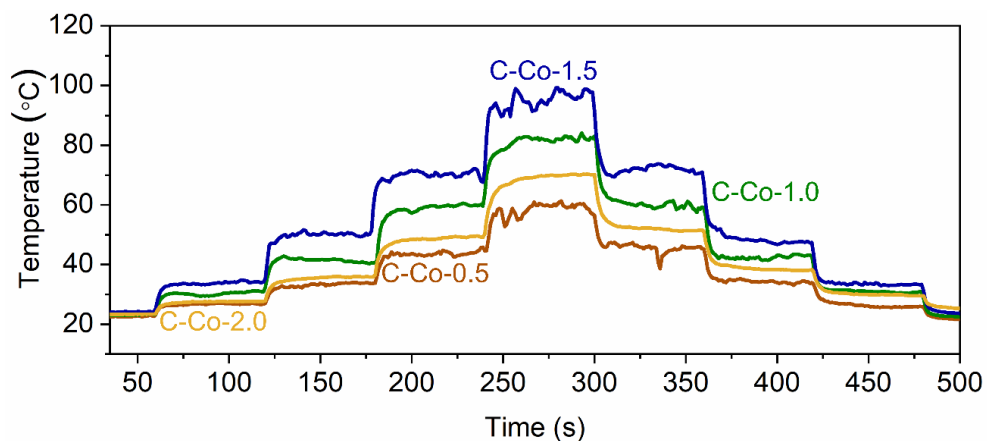

Fig. S17. Temperature profiles under stepwise-increased/decreased input voltages.

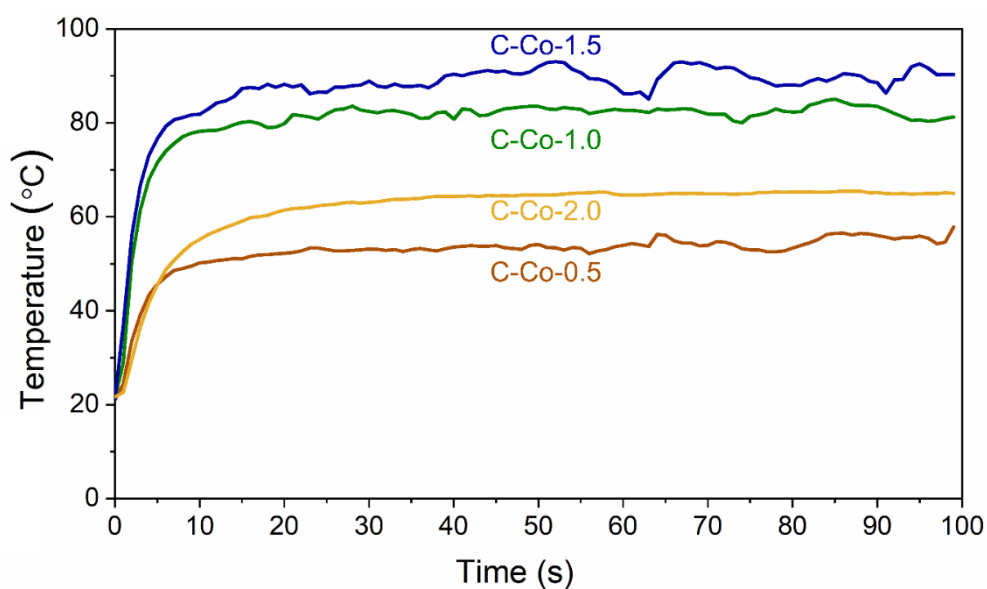

Fig. S18. Long-term time-temperature curve at a constant voltage of 2.5 V.

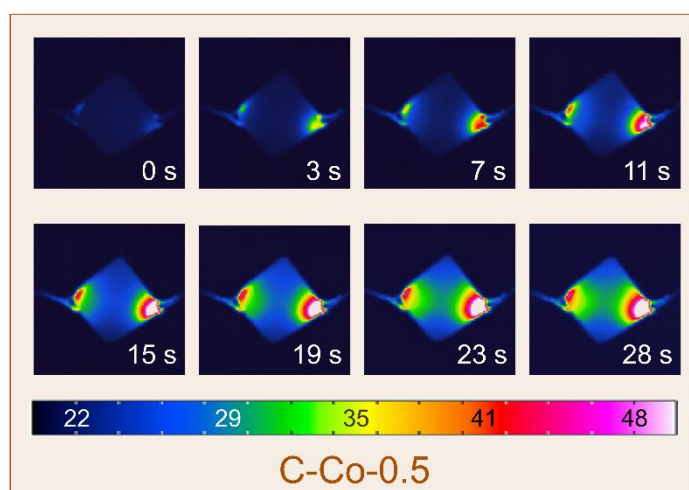

Fig. S19. Infrared thermal images of C-Co-0.5 at an interval of 4 s.

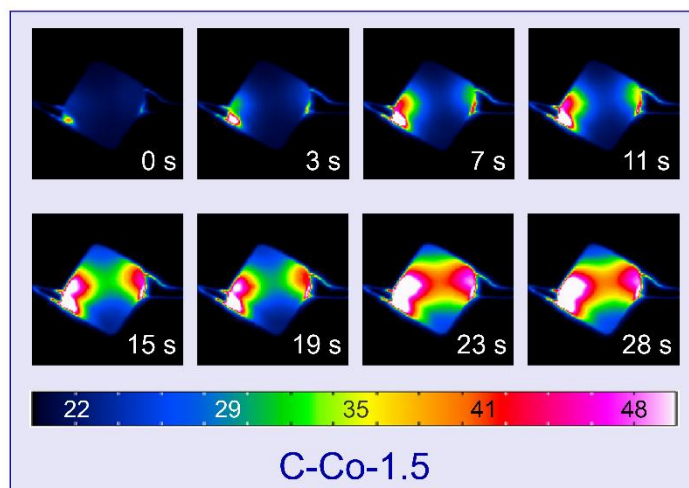

Fig. S20. Infrared thermal images of C-Co-1.5 at an interval of 4 s.

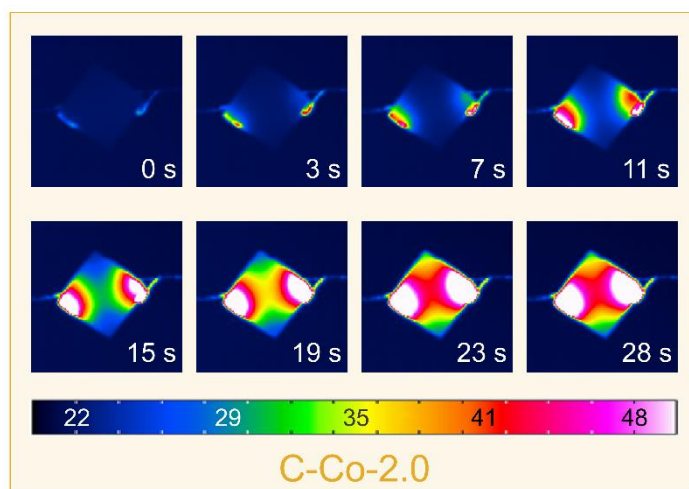

Fig. S21. Infrared thermal images of C-Co-2.0 at an interval of 4 s.

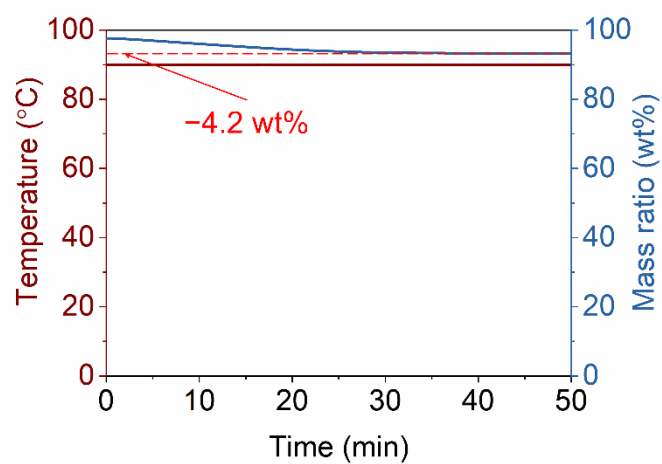

Fig. S22. Mass ratio for Co@CNTs/CW foams (C-Co-1.0) during annealing at 90 °C.

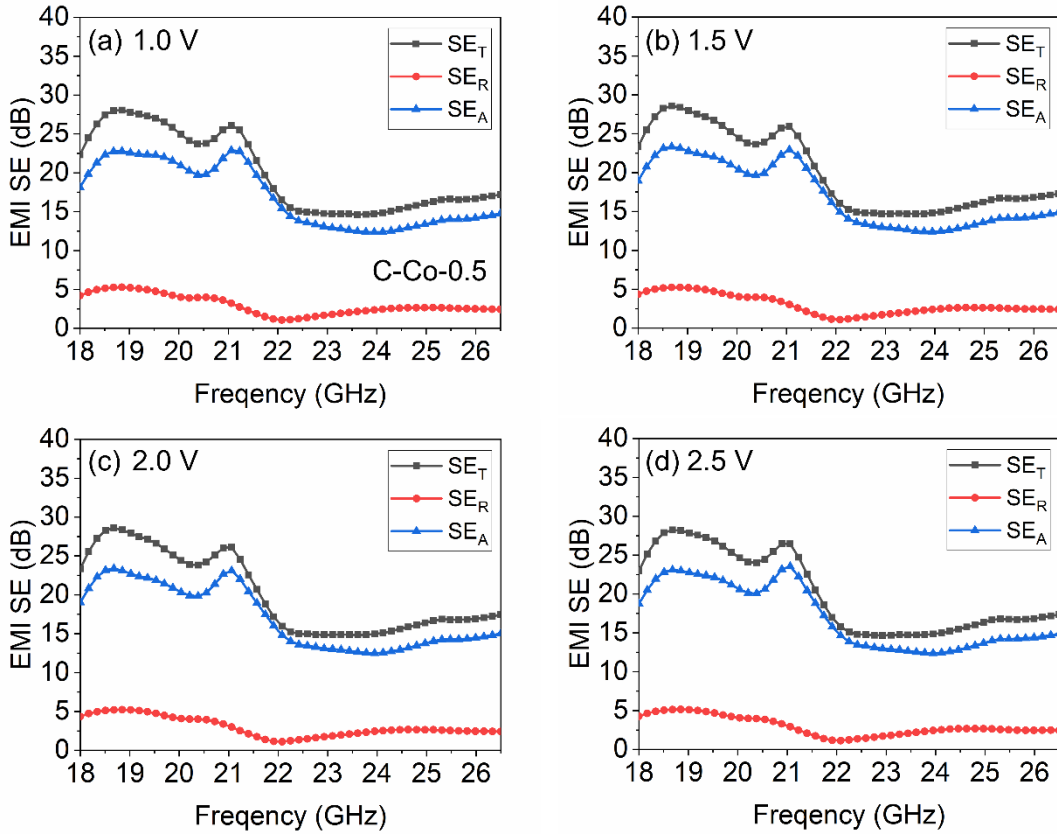

Fig. S23. EMI  $SE_T$ ,  $SE_A$ , and  $SE_R$  curves of C-Co-0.5.

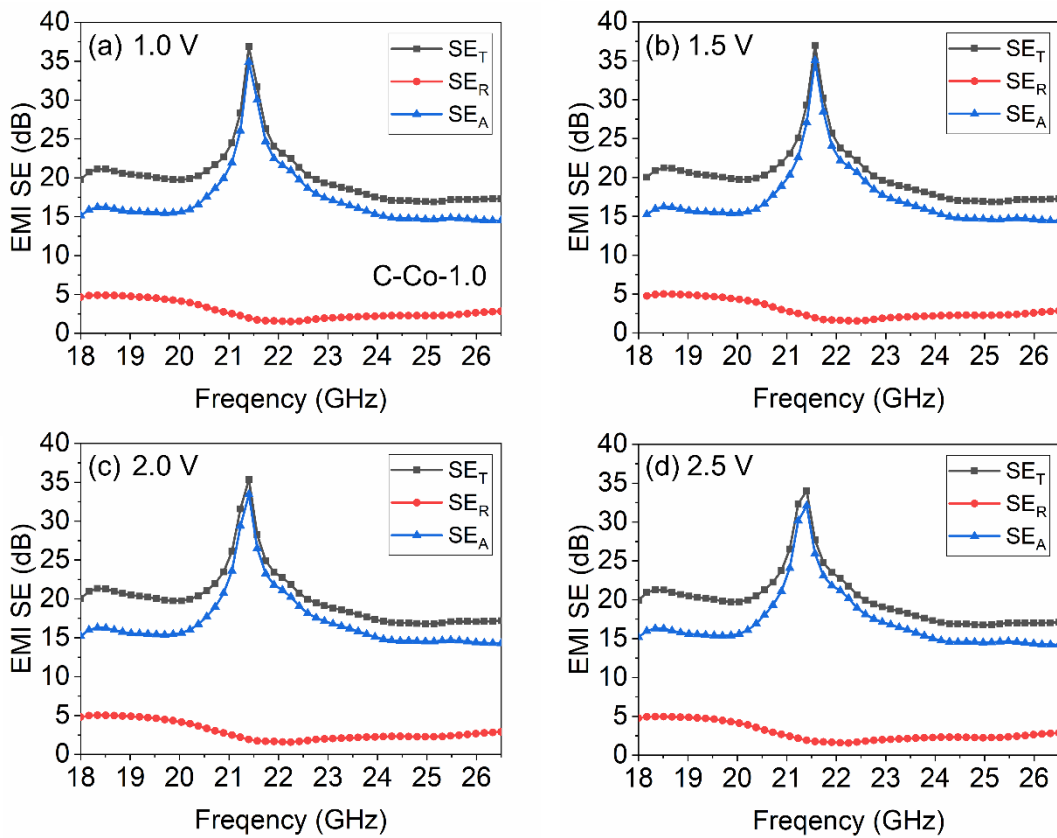

Fig. S24. EMI  $SE_T$ ,  $SE_A$ , and  $SE_R$  curves of C-Co-1.0.

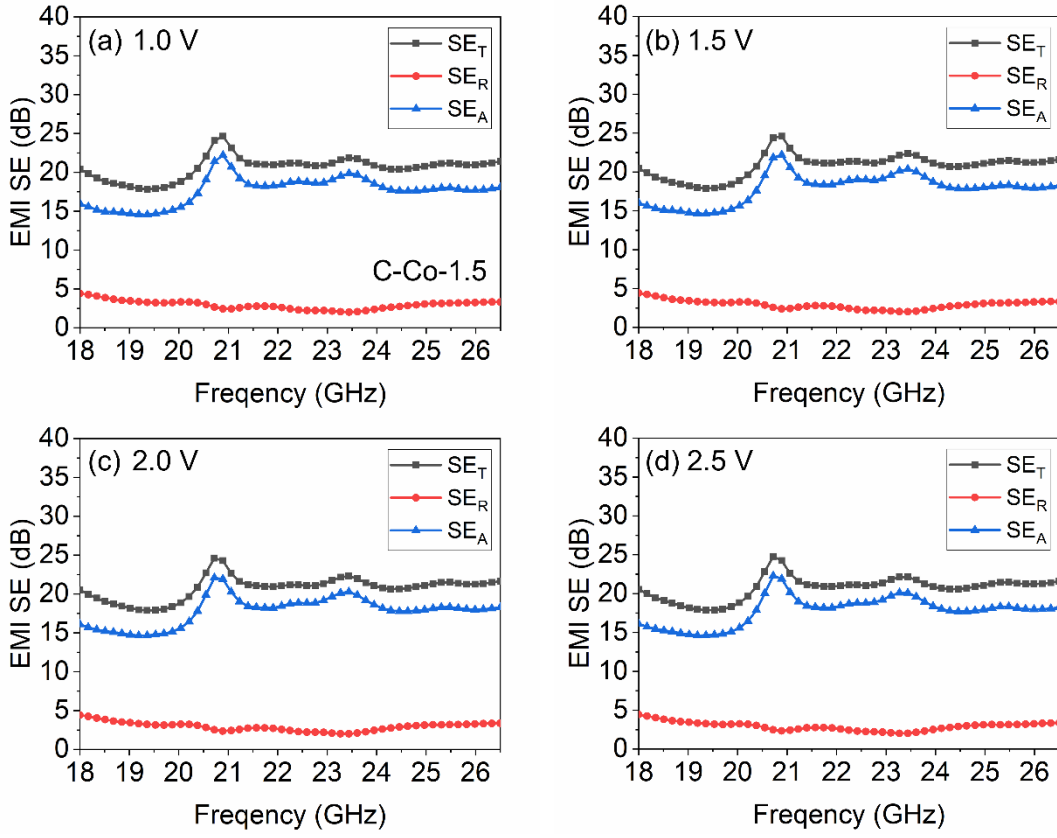

Fig. S25. EMI  $SE_T$ ,  $SE_A$ , and  $SE_R$  curves of C-Co-1.5.

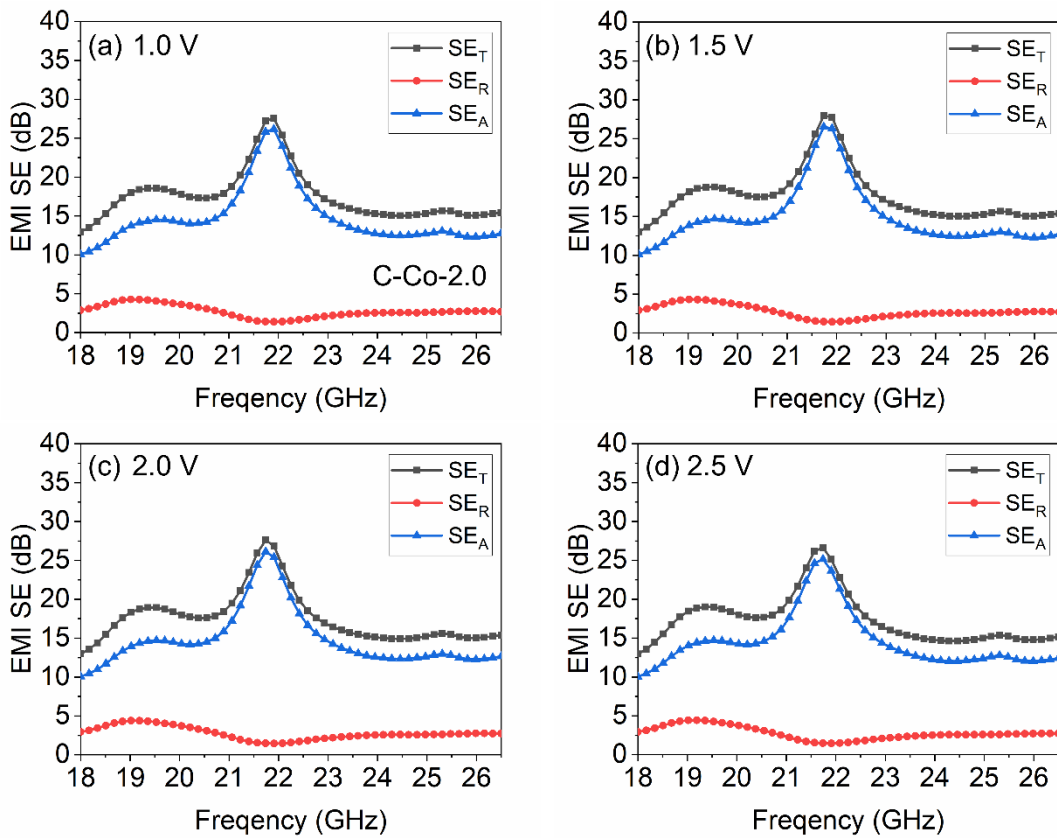

Fig. S26. EMI  $SE_T$ ,  $SE_A$ , and  $SE_R$  curves of C-Co-2.0.



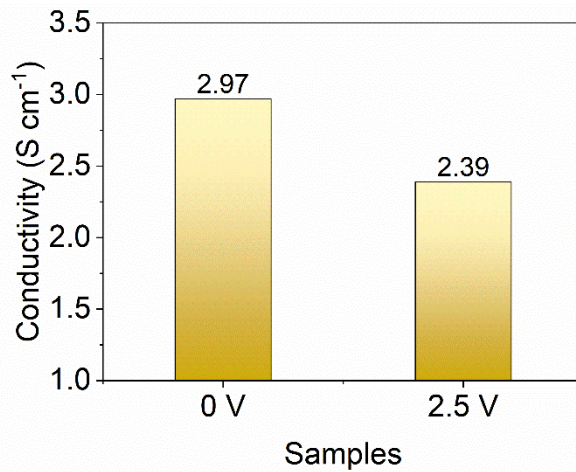

Fig. S27. Conductivity of Co@CNTs/CW foams.

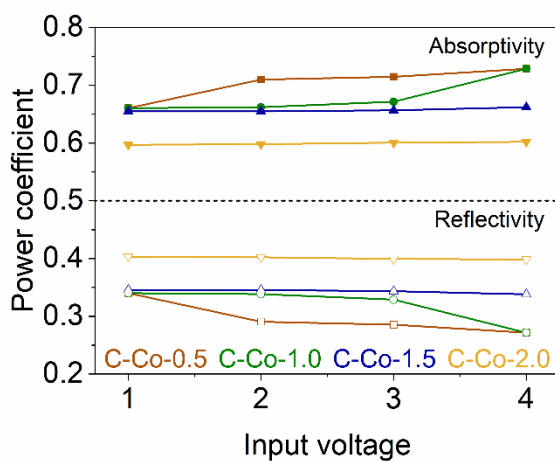

Fig. S28. (a) Reflectivity and (b) absorptivity of Co@CNTs/CW foams.

**Table S1.** Relationship between Co precursor concentration and Co content

| Samples  | Co precursor concentration (mol L <sup>-1</sup> ) | Co content (wt %) |
|----------|---------------------------------------------------|-------------------|
| C-Co-0.5 | 0.5                                               | 7.15              |
| C-Co-1.0 | 1.0                                               | 9.60              |
| C-Co-1.5 | 1.5                                               | 12.8              |
| C-Co-2.0 | 2.0                                               | 18.0              |

**Table S2.** Typical EMI shielding performance for some wood-derived and in-situ grown CNT materials

| Type                        | Shield                                           | SE <sub>T</sub><br>(dB) | SE <sub>R</sub><br>(dB) | Absorptivity | t<br>(mm) | Density<br>(g cm <sup>-3</sup> ) | SSE<br>(dB cm <sup>3</sup> g <sup>-1</sup> ) | Ref.       |
|-----------------------------|--------------------------------------------------|-------------------------|-------------------------|--------------|-----------|----------------------------------|----------------------------------------------|------------|
| Carbonized wood materials   | CW/FeCl <sub>3</sub> @PPy                        | 23                      | >2.5                    | 0.562        | 7         | 0.110                            | 209.09                                       | 1          |
|                             | CW/Ni                                            | 50.8                    | 6.5                     | 0.224        | 2         | 0.288                            | 176.39                                       | 2          |
|                             | CW/epoxy                                         | 27.8                    | 1.1                     | 0.776        | 2         | 1.170                            | 23.76                                        | 3          |
|                             | CW/Ni@N-doped CNT                                | 73.7                    | ~5                      | 0.316        | 2         | 0.541                            | 136.23                                       | 4          |
|                             | CW/MXene/CNT/PDMS                                | 29.3                    | 6.9                     | 0.204        | 8         | 0.150                            | 195.33                                       | 5          |
|                             | CW                                               | 63.4                    | 2.2                     | 0.603        | 3.5       | 0.290                            | 218.62                                       | 6          |
|                             | CW/TPI/MXene <sup>a</sup>                        | 44.7                    | ~5                      | 0.316        | 10        | 0.150                            | 298.00                                       | 7          |
|                             | CW/ $\gamma$ -Fe <sub>2</sub> O <sub>3</sub>     | 44.8                    | ~6                      | 0.251        | 3         | 0.271                            | 165.31                                       | 8          |
|                             | CW/Ni                                            | 34.1                    | 4.1                     | 0.389        | 2         | 0.262                            | 130.15                                       | 9          |
|                             | CW/MXene                                         | 61.3                    | >10                     | 0.100        | 3         | 0.197                            | 311.17                                       | 10         |
| In situ grown CNT materials | SiC encapsulated Fe@CNT                          | 36.48                   | ~5                      | 0.316        | 1.8       | 0.600                            | 60.80                                        | 11         |
|                             | CMF@SiO <sub>2</sub> -CNT/PDMS <sup>c</sup>      | 61.34                   | 7.69                    | 0.170        | 2         | /                                | /                                            | 12         |
|                             | CNT-coated on PAN/Fe <sub>3</sub> O <sub>4</sub> | 80.0                    | 10.3                    | 0.093        | 2         | 1.000                            | 80.00                                        | 13         |
|                             | GF@Ni-CNT <sup>d</sup>                           | 51.0                    | 7.5–10                  | 0.100        | 0.83      | /                                | /                                            | 14         |
|                             | Pyrocarbon/CNT@graphene                          | 45.3                    | ~12.5                   | 0.056        | 2.5       | 1.07                             | 42.34                                        | 15         |
|                             | CW/Ni@CNTs                                       | 35.0                    | ~4                      | 0.398        | 4         | 0.117                            | 299.15                                       | 16         |
|                             | CF/FeCo@CNTs <sup>e</sup>                        | 41.4                    | 8.3                     | 0.148        | 4.3       | /                                | /                                            | 17         |
| This study                  | CW/Co@CNTs                                       | 42.0                    | 1.9                     | 0.646        | 4         | 0.108                            | 388.89                                       | This study |
|                             |                                                  | 59.8                    | 4.8                     | 0.331        | 4         | 0.135                            | 442.96                                       |            |

<sup>a</sup>TPI: trans-1,4-polyisoprene; <sup>b</sup>BF: Basalt fiber fabric; <sup>c</sup>CMF: Carbonated melamine foam; <sup>d</sup>GF: Glass fiber; <sup>e</sup>CF: carbon fiber.

**Table S3.** Typical EMI shielding, hydrophobicity, and Joule Heating properties in the literature

| Shield                                       | EMI SE <sub>T</sub><br>(dB) | SE <sub>R</sub><br>(dB) | Absorptivity | t<br>(mm) | Contact angle<br>(°) | Saturated<br>temperature<br>(°C) | Ref.          |
|----------------------------------------------|-----------------------------|-------------------------|--------------|-----------|----------------------|----------------------------------|---------------|
| PC/MXene/Hf-SiO <sub>2</sub> film            | 20.1                        | 9.4                     | 0.115        | 2         | 150.7                | 100 (13 V)                       | 18            |
| MTMS-M/FG <sup>a</sup> composite             | 57.8                        | ~10                     | 0.100        | 0.5       | 138.0                | 95 (4 V)                         | 19            |
| Silicone/MXene/cellulose nanofibers aerogel  | 39.5                        | 8.4                     | 0.145        | 0.9       | 138.0                | 75 (9 V)                         | 20            |
| Polypyrrole/MXene-decorated textile          | 42.0                        | /                       | /            | 0.43      | 126.0                | 79 (4 V)                         | 21            |
| Carbonized wood                              | 63.4                        | 2.2                     | 0.603        | 3.5       | 13.2                 | 90.2 (2 V)                       | 6             |
| Polydopamine/CNTs-coated cotton fabric       | 23.0                        | ~3                      | 0.501        | /         | 138.0                | 85 (6 V)                         | 22            |
| NR-BP <sup>b</sup>                           | 31.9                        | ~13                     | 0.050        | 0.05      | 122.0                | 155.5 (6 V)                      | 23            |
| BC-BP <sup>c</sup>                           | 24.9                        | ~10                     | 0.100        | 0.036     | 40.0                 | 124 (6 V)                        | 24            |
| MXene/electrospun poly(lactic acid) membrane | 55.4                        | 13.6                    | 0.044        | 0.15      | /                    | 52.8 (1.5 V)                     | 25            |
| PVDF/MXene/AgNW film <sup>d</sup>            | 45.4                        | ~10                     | 0.100        | /         | /                    | 77 (2.5 V)                       | 26            |
| CW/Ni                                        | 44.3                        | 6.5                     | 0.224        | 2         | 152.1                | /                                | 2             |
| CW/Co@CNT foam                               | 42.0                        | 1.9                     | 0.646        | 4         | 140.2                | 80.5 (2.5 V)                     | This<br>study |
|                                              | 59.8                        | 4.8                     | 0.331        | 4         | 138.6                | 65.5 (2.5 V)                     |               |

<sup>a</sup>MTMS-M/FG: Methyltrimethoxysilane/MXene/wood-pulp fabric grid; <sup>b</sup>NR-BP: natural rubber toughened CNT buckypaper; <sup>c</sup>BC-BP: bacterial cellulose toughened CNT buckypaper; <sup>d</sup>PVDF/MXene/AgNW film: Poly(vinylidene fluoride)/MXene/silver nanowire.

**Table S4.** Reported work function of Co and CNT in the literature

| Materials | Temperature (°C) | Co        | Ref.  |
|-----------|------------------|-----------|-------|
| Co        | 25               | 4.89      | 27    |
|           | 100              | 4.84      | 28    |
|           | 205              | 4.82      | 27    |
| CNT       | 25               | 4.50–4.80 | 29-31 |
|           | 130              | 4.20      | 32    |
|           | 200              | 2.85      |       |

## References

- 1 W. Gan, C. Chen, M. Giroux, G. Zhong, M.M. Goyal, Y. Wang, W. Ping, J. Song, S. Xu, S. He, M. Jiao, C. Wang and L. Hu, *Chem. Mater.*, 2020, **32**, 5280-5289.
- 2 Y. Zheng, Y. Song, T. Gao, S. Yan, H. Hu, F. Cao, Y. Duan and X. Zhang, *ACS Appl. Mater. Inter.*, 2020, **12**, 40802-40814.
- 3 Z. Shen and J. Feng, *ACS Sustain. Chem. Eng.*, 2019, **7**, 6259-6266.
- 4 M. Cheng, W. Ren, H. Li, X. Liu, S. Bandaru, J. Zhang and X. Zhang, *Composites, Part B*, 2021, **224**, 109169.
- 5 Z. Wang, X. Han, Z. Zhou, W. Meng, X. Han, S. Wang and J. Pu, *Compos. Sci. Technol.*, 2021, **213**, 108931.
- 6 B. Zhao, P. Bai, S. Wang, H. Ji, B. Fan, R. Zhang and R. Che, *ACS Appl. Mater. Inter.*, 2021, **13**, 29101-29112.
- 7 X. Jia, B. Shen, L. Zhang and W. Zheng, *Chem. Eng. J.*, 2021, **405**, 126927.
- 8 Y. Li, S. Yan, Z. Zhang, Y. Liao, H. Rong, R. Zhao and G. Qin, *ACS Appl. Nano Mater.*, 2022, **5**, 8537-8545.
- 9 T. Gao, Y. Ma, L. Ji, Y. Zheng, S. Yan, Y. Li and X. Zhang, *Adv. Compos. Hybrid Mater.*, 2022, **5**, 2328-2338.
- 10 C. Liang, H. Qiu, P. Song, X. Shi, J. Kong and J. Gu, *Sci. Bull.*, 2020, **65**, 616-622.
- 11 H. Mei, X. Zhao, X. Gui, D. Lu, D. Han, S. Xiao and L. Cheng, *Ceram. Int.*, 2019, **45**, 17144-17151.
- 12 B. Huang, J. Yue, B. Fan, X. Tang, Y. Liu and X. Huang, *Compos. Sci. Technol.*, 2022, **222**, 109372.
- 13 H. Wei, W. Zheng, Z. Jiang and Y. Huang, *J. Mater. Chem. C*, 2019, **7**, 14375-14383.
- 14 Y. Liu, D. He, O. Dubrunfaut, A. Zhang, L. Pichon and J. Bai, *Appl. Compos. Mater.*, 2021, **28**, 777-790.
- 15 L. Feng, Y. Zuo, X. He, X. Hou, Q. Fu, H. Li and Q. Song, *Carbon*, 2020, **168**, 719-731.
- 16 B. Zhao, P. Bai, M. Yuan, Z. Yan, B. Fan, R. Zhang and R. Che, *Carbon*, 2022, **197**, 570-578.
- 17 Q. Men, S. Wang, Z. Yan, B. Zhao, L. Guan, G. Chen, X. Guo, R. Zhang and R. Che, *Adv. Compos. Hybrid Mater.*, 2022, **5**, 2429-2439.
- 18 B. Zhou, Z. Li, Y. Li, X. Liu, J. Ma, Y. Feng, D. Zhang, C. He, C. Liu and C. Shen, *Compos. Sci. Technol.*, 2021, **201**, 108531.
- 19 X. Jia, B. Shen, L. Zhang and W. Zheng, *Composites, Part B*, 2020, **198**, 108250.
- 20 W. Xin, M. Ma and F. Chen, *ACS Appl. Nano Mater.*, 2021, **4**, 7234-7243.
- 21 Q. Wang, H. Zhang, J. Liu, S. Zhao, X. Xie, L. Liu, R. Yang, N. Koratkar and Z. Yu, *Adv. Funct. Mater.*, 2019, **29**, 1806819.
- 22 J. Ma, Q. Zhao, Y. Zhou, P. He, H. Pu, B. Song, S. Pan, Y. Wang and C. Wang, *Polym. Test.*, 2021, **100**, 107240.
- 23 M. Fan, S. Li, L. Wu, L. Li, M. Qu, J. Nie, R. Zhang, P. Tang and Y. Bin, *Chem. Eng. J.*, 2022, **433**, 133499.
- 24 M. Fan, X. Xia, S. Li, R. Zhang, L. Wu, M. Qu, P. Tang and Y. Bin, *Chem. Eng. J.*, 2022, **441**, 136103.
- 25 Z. Du, K. Chen, Y. Zhang, Y. Wang, P. He, H. Mi, Y. Wang, C. Liu and C. Shen, *Composites Communications*, 2021, **26**, 100770.
- 26 S. Yang, D. Yan, Y. Li, J. Lei and Z. Li, *Ind. Eng. Chem. Res.*, 2021, **60**, 9824-9832.
- 27 J. Heras and E.V. Albano, *Thin Solid Films*, 1983, **106**, 275-284.

- 28 J.M. Heras and E.V. Albano, *Appl. Surf. Sci.*, 1981, **7**, 332-346.
- 29 S.J. Tans, A.R. Verschueren and C. Dekker, *Nature*, 1998, **393**, 49-52.
- 30 S.C. Lim, H.J. Jeong, K.S. Kim, I.B. Lee, D.J. Bae and Y.H. Lee, *Carbon*, 2005, **43**, 2801-2807.
- 31 S. Suzuki, C. Bower, Y. Watanabe and O. Zhou, *Appl. Phys. Lett.*, 2000, **76**, 4007-4009.
- 32 C.M. Tan, J. Jia and W. Yu, *Appl. Phys. Lett.*, 2005, **86**.
